# Supplementary material for: Glutamatergic Agents in the Treatment of Compulsivity and Impulsivity in Child and Adolescent Psychiatry: a Systematic Review of the Literature
Source: Atypon-hosted journal article supplement (doi:10.1024/1422-4917/a000546), 2017-09-18
Supplement: 1422-4917_a000546_esm1.pdf [file 1422-4917_a000546_esm1.pdf]

## ONLINE SUPPLEMENTARY TABLES

**Table S1**

Rates of serious adverse events (all) and adverse events (at least 5 % in one of the study groups) reported for the included studies investigating d-cycloserine (listed by frequency).

| <b>D-Cycloserine</b>          |                                                |              |                      |
|-------------------------------|------------------------------------------------|--------------|----------------------|
|                               | <b>RCTs</b>                                    |              | <b>OLTs</b>          |
|                               | (Farrell et al., 2013;<br>Storch et al., 2010) |              | (Posey et al., 2004) |
|                               | <b>Drug</b>                                    | <b>Plc</b>   | <b>Drug</b>          |
| <b>Total N</b>                | <b>24</b>                                      | <b>23</b>    | <b>12</b>            |
|                               | <b>n (%)</b>                                   | <b>n (%)</b> | <b>n (%)</b>         |
| <b>Serious adverse events</b> |                                                |              |                      |
| -                             | -                                              | -            | -                    |
| <b>Adverse events</b>         |                                                |              |                      |
| Increased echolalia           | -                                              | -            | 1 (8.3)              |
| Transient motor tic           | -                                              | -            | 1 (8.3)              |

**Abbreviations:** OLTs: Open-label trials; Plc: placebo; RCTs: randomized controlled trials.

**Table S2**

Rates of serious adverse events (all) and adverse events (at least 5 % in one of the study groups) reported for the included studies investigating memantine (listed by frequency).

| <b>Memantine</b>              |                                                                  |              |                                                                                                       |
|-------------------------------|------------------------------------------------------------------|--------------|-------------------------------------------------------------------------------------------------------|
|                               | <b>RCTs</b>                                                      |              | <b>OLTs</b>                                                                                           |
|                               | (Ghaleiha, Asadabadi, et al., 2013; Hardan, 2014; Hendren, 2014) |              | (Chez et al., 2007; Owley et al., 2006), (Erickson et al., 2007; Findling et al., 2007; Melmed, 2014) |
|                               | <b>Drug</b>                                                      | <b>Plc</b>   | <b>Drug</b>                                                                                           |
| <b>Total N</b>                | <b>400</b>                                                       | <b>240</b>   | <b>1106</b>                                                                                           |
|                               | <b>n (%)</b>                                                     | <b>n (%)</b> | <b>n (%)</b>                                                                                          |
| <b>Serious adverse events</b> |                                                                  |              |                                                                                                       |
| Not further specified         | -                                                                | -            | 6 (0.5)                                                                                               |
| <b>Adverse events</b>         |                                                                  |              |                                                                                                       |
| Headache                      | -                                                                | -            | 80 (7.2)                                                                                              |
| Nasopharyngitis               | -                                                                | -            | 59 (5.3)                                                                                              |

Abbreviations: OLTs: O-label trials; Plc: placebo; RCTs: randomized controlled trials.

**Table S3**

Rates of serious adverse events (all) and adverse events (at least 5 % in one of the study groups) reported for the included studies investigating minocycline (listed by frequency).

| <b>Minocycline</b>            |                      |              |                                              |
|-------------------------------|----------------------|--------------|----------------------------------------------|
|                               | <b>RCTs</b>          |              | <b>OLTs</b>                                  |
|                               | (Leigh et al., 2013) |              | (Paribello et al., 2010; Utari et al., 2010) |
|                               | <b>Drug</b>          | <b>Plc</b>   | <b>Drug</b>                                  |
| <b>Total N</b>                | <b>33</b>            | <b>33</b>    | <b>70</b>                                    |
|                               | <b>n (%)</b>         | <b>n (%)</b> | <b>n (%)</b>                                 |
| <b>Serious adverse events</b> |                      |              |                                              |
| -                             | -                    | -            | -                                            |
| <b>Adverse events</b>         |                      |              |                                              |
| Diarrhoea                     | 15 (45.5)            | 15 (45.5)    | 3 (4.3)                                      |
| Skin rash                     | 12 (36.4)            | 7 (21.2)     | -                                            |
| Gastrointestinal distress     | 9 (27.3)             | 15 (45.5)    | 18 (25.7)                                    |
| Fever                         | 6 (18.2)             | 11 (33.3)    | -                                            |

|                                         |          |          |         |
|-----------------------------------------|----------|----------|---------|
| Discoloration of teeth                  | 5 (15.2) | -        | -       |
| Headache                                | 4 (12.1) | 5 (15.1) | 2 (2.9) |
| Sunburn/sun sensitivity                 | 4 (12.1) | 1 (3.0)  | -       |
| Blue-grey hue to teeth or other tissues | 3 (9.0)  | 1 (3.0)  | -       |
| Daytime drowsiness                      | 2 (6.1)  | 3 (9.0)  | -       |
| Increased appetite                      | 2 (6.1)  | 1 (3.0)  | -       |
| Insomnia                                | 2 (6.1)  | -        | -       |
| Dark coloured urine                     | 1 (3.0)  | 2 (6.1)  | -       |
| Dizziness                               | -        | 1 (3.0)  | 4 (5.7) |
| Infection                               | -        | -        | 2 (6.1) |

**Abbreviations:** OLTs: O-label trials; Plc: placebo; RCTs: randomized controlled trials.

**Table S4**

Rates of serious adverse events (all) and adverse events (at least 5 % in one of the study groups) reported for the included studies investigating modafinil (listed by frequency).

| <b>Modafinil</b>                  |                      |              |
|-----------------------------------|----------------------|--------------|
|                                   | <b>RCTs</b>          |              |
|                                   | (Wigal et al., 2006) |              |
|                                   | <b>Drug</b>          | <b>Plc</b>   |
| <b>Total N</b>                    | <b>420</b>           | <b>215</b>   |
|                                   | <b>n (%)</b>         | <b>n (%)</b> |
| <b>Serious adverse events</b>     |                      |              |
| Asthma                            | 1 (0.2)              | -            |
| Dehydration                       | 1 (0.2)              | -            |
| Duodenitis                        | 1 (0.2)              | -            |
| Erythema multiforme               | 1 (0.2)              | -            |
| Hypertonia                        | 1 (0.2)              | -            |
| Influenza syndrome                | 1 (0.2)              | -            |
| Peptic ulcer                      | 1 (0.2)              | -            |
| Possible Stevens-Johnson syndrome | 1 (0.2)              | -            |
| <b>Adverse events</b>             |                      |              |
| Insomnia                          | 115 (27.4)           | 9 (4.2)      |
| Headache                          | 82 (19.5)            | 28 (13.0)    |
| Decreased appetite                | 67 (16.0)            | 6 (2.8)      |
| Infection                         | 46 (11.0)            | 1 (0.5)      |
| Abdominal pain                    | 40 (9.5)             | -            |
| Increased cough                   | 32 (7.6)             | -            |
| Rhinitis                          | 31 (7.4)             | -            |
| Pharyngitis                       | 30 (7.1)             | -            |
| Fever                             | 21 (5.0)             | -            |
| Vomiting                          | 21 (5.0)             | -            |

**Abbreviations:** Plc: Placebo; RCTs: Randomized controlled trials.

**Table S5**

Rates of serious adverse events (all) and adverse events (at least 5 % in one of the study groups) reported for the included studies investigating N-acetylcysteine (listed by frequency).

| <b>N-Acetylcysteine</b>       |                                                                                           |              |
|-------------------------------|-------------------------------------------------------------------------------------------|--------------|
|                               | <b>RCTs</b>                                                                               |              |
|                               | (Bloch et al., 2013)<br>(Ghanizadeh et al., 2013),<br>(Ghanizadeh & Moghimi-Sarani, 2013) |              |
|                               | <b>Drug</b>                                                                               | <b>Plc</b>   |
| <b>Total N</b>                | <b>51</b>                                                                                 | <b>44</b>    |
|                               | <b>n (%)</b>                                                                              | <b>n (%)</b> |
| <b>Serious adverse events</b> |                                                                                           |              |
| -                             | -                                                                                         | -            |
| <b>Adverse events</b>         |                                                                                           |              |
| Nausea                        | 6 (11.8)                                                                                  | 12 (27.3)    |
| Constipation                  | 5 (9.8)                                                                                   | 1 (2.3)      |
| Increased appetite            | 5 (9.8)                                                                                   | 3 (6.8)      |
| Daytime drowsiness            | 4 (7.8)                                                                                   | 2 (4.5)      |
| Nervousness                   | 4 (7.8)                                                                                   | -            |
| Decreased appetite            | 3 (5.9)                                                                                   | 1 (2.3)      |
| Fatigue                       | -                                                                                         | 6 (13.6)     |

**Abbreviations:** Plc: Placebo; RCTs: Randomized controlled trials.

**Table S6**

Rates of serious adverse events (all) and adverse events (at least 5 % in one of the study groups) reported for the included studies investigating riluzole (listed by frequency).

| <b>N-Acetylcysteine</b>       |                                                              |              |                      |
|-------------------------------|--------------------------------------------------------------|--------------|----------------------|
|                               | <b>RCTs</b>                                                  |              | <b>OLTs</b>          |
|                               | (Ghaleiha, Mohammadi, et al., 2013),<br>(Grant et al., 2014) |              | (Grant et al., 2007) |
|                               | <b>Drug</b>                                                  | <b>Plc</b>   | <b>Drug</b>          |
| <b>Total N</b>                | <b>50</b>                                                    | <b>50</b>    | <b>6</b>             |
|                               | <b>n (%)</b>                                                 | <b>n (%)</b> | <b>n (%)</b>         |
| <b>Serious adverse events</b> |                                                              |              |                      |
| Pancreatitis                  | 1 (2.0)                                                      | -            | -                    |
| <b>Adverse events</b>         |                                                              |              |                      |
| Increased appetite            | 12 (24.0)                                                    | 3 (6.0)      | -                    |
| Drowsiness                    | 7 (14.0)                                                     | 4 (8.0)      | 1 (16.7)             |
| Increased salivation          | 6 (12.0)                                                     | 6 (12.0)     | -                    |
| Abdominal pain                | 5 (10.0)                                                     | 2 (4.0)      | -                    |
| Elevated liver function tests | 5 (10.0)                                                     | -            | 2 (33.3)             |
| Restlessness                  | 4 (8.0)                                                      | 1 (2.0)      | -                    |
| Nervousness                   | 3 (6.0)                                                      | 1 (2.0)      | -                    |
| Vomiting                      | 1 (2.0)                                                      | -            | 1 (16.7)             |

**Abbreviations:** OLTs: Open-label trials; Plc: placebo; RCTs: randomized controlled trials.
